# Supplementary material for: Synthesis of a 2D polymeric cluster {[NEt4][Mo2O2S6Cu6I3(4,4′-bipy)5]·MeOH·H2O}n with a significant improvement of optical limiting effect
Source: Royal Society of Chemistry journal article supplement (doi:10.1039/b101929p), 2001-01-01
Supplement: b101929p.doc [file b101929p.doc]

*Qian-Feng Zhang et. al., Chem. Commun.* *Ref.: B101929P*

***Supplementary materials***

**Synthesis of a 2D polymeric cluster {[NEt4][Mo2O2S6Cu6I3(4,4'-bipy)5]MeOHH2O}n with a significant improvement of optical limiting effect**

**Qian-Feng Zhang, Yunying Niu, Wa-Hung Leung,* Yinglin Song, Ian D. Williams and Xinquan Xin***

1. ***Preparation of {[NEt4][Mo2O2S6Cu6I3(4,4'-bipy)5]MeOHH2O}n (3)***

A solution of monomer nest shaped cluster [NEt4]2[MoOS3Cu3I3] (**1**) (1.04 g, 1.00 mmol) in DMF (10 mL) was added slowly to a solution of 4,4'-bipy (0.86 g, 5.5 mmol) in MeCN (5 mL) with stirring. After the mixture was stirred for 15 min., the red solution gradually turned to dark-red with a little red precipitate was subsequently filtered. The filtrate was allowed to stand at room temperature in the air for three days after which dark-red crystals of **3** were harvested. Yield: 0.45 g, 43% (relative to the Mo).

The same procedure as in the above preparation was employed using twin nest shaped cluster [NEt4]4[Mo2O2S6Cu6I6] (**2**) (1.04 g, 0.50 mmol) as a starting material instead of cluster **1**. Elemental analyses and cell dimensions determination showed that the isolated compound was identical to **3** by the above method. Yield: 53 g, 51% (relative to the Mo).

1. ***Crystal data, data collection and structure refinement parameters for*** 3

| compound | {[NEt4][Mo2O2S6Cu6I3(4,4'-bipy)5]MeOHH2O}n |
| --- | --- |
| empirical formula | C59H66N11O4S6I3Cu6Mo2 |
| formula weight | 2139.41 |
| crystal system | Triclinic |
| space group | *P*1 |
| unit cell dimension, Å /  | *a* = 11.03290(10), ** = 72.2980(10) |
|  | *b* = 11.8242(2), ** = 81.4440(10) |
|  | *c* = 15.3874(2), ** = 84.8620(10) |
| volume, Å3 | 1888.94(4) |
| *Z* | 1 |
| density (calculated), Mg·m3 | 1.881 |
| absorption coefficient, mm1 | 3.416 |
| *F*(000) | 1042 |
| crystal size, mm | 0.22  0.18  0.16 |
| crystal color | dark red |
| diffractometer | Siemens Smart CCD |
| temperature, K | 293 |
| wavelength (Mo K), Å | 0.71073 |
| scan type | ** |
| scan rate | 10 seconds/frame, 0.5/frame |
| ** range for data collection | 1.40 to 28.35 |
| limiting indices | 9 < *h* < 14 |
|  | 15 < *k* < 15 |
|  | 20 < *l* < 20 |
| reflections collected | 13699 |
| independent reflections | 10605 (*R*int = 5.98%) |
| observed reflections | 6228 (*I* > 2.0(*I*)) |
| max. and min. transmission | 0.5932 and 0.1416 |
| refinement method | full-matrix least-squares on *F*2 |
| data/restraints/parameters | 10605/8/795 |
| weight scheme ** a | 1/[**2(*F*o)2 + 0.0583*P*2 + 0.000*P*] |
| goodness-of-fit on *F*2 | 0.937 |
| final *R** indices [*I*>2**(*I*)] b,c | *R*1= 0.0646, w*R*2= 0.1531 |
| *R* indices (all data ) | *R*1= 0.1031, w*R*2= 0.1730 |
| max./mean shift in final cycle | 0.005/0.001 |
| largest diff. peak and hole, eÅ3 | 1.663 and –1.671 |

a *P* = (*F*o2 + 2*F*c2)/3.

b *R*1 = *F*o  *F*c/*F*o.

c w*R*2 = [*w*(*F*o2  *F*c2)2/*w**F*o22]1/2 .

1. ***X-ray crystallographic structure determination***

Crystals of polymeric cluster **3** were directly obtained from the reaction mixture. A suitable single crystal (0.22  0.18  0.16 mm) was selected and mounted on a Siemens Smart CCD area-detecting diffractometer for study using graphite-monochromated Mo K (** = 0.71073 Å) radiation at room temperature. Data were measured using ** scans of 0.5 per frame, such that a hemisphere was collected. Cell parameters were retrieved using SMART software and refined using SAINT on all observed reflections. Data reduction was performed with SAINT software which corrects for Lorentz polarization and decay. Absorption corrections were applied using SADABS. Structure was solved by direct methods using SHELXS-97 and refined by least squares on *F*2 (SHELXL-97). Non-hydrogen atoms except one of carbon atom in [NEt4]+ cation and solvent molecules were described anisotropically. Hydrogen atoms were placed in idealized positions and refined employing a riding model with thermal parameters 1.5 or 1.2 those of the bond carbon atoms.

The structure of **3** was originally solved in centrosymmetric space group *P*1 but could not be fully refined owing to disorder of ethyl groups of [NEt4]+ cation and pyridine rings in a 4,4'-bipy ligand, (of which I(3) atom was treated with site occupancy of 0.5). The 95Mo NMR spectrum of **3** exhibits two singlets, suggesting that there are two chemically inequivalent molybdenum atoms in this compound. Thus, solution and further refinement in non-centrosymmetric space group *P*1 using a racemic twin model and employing the TWIN statement in SHELXL-97 proceeded satisfactorily and resulted in a BASF (relative batch scale factor) of 0.452. In this model, all non-hydrogen atoms except one of carbon atoms in an ethyl group [C(05)] and solvent molecules were refined anisotropically, and the carbon atoms of the ethyl groups in [NEt4]+ cation were refined with fixed CC bond distances. The disorder of carbon atom in MeOH was treated with variable occupancy and rigid body restraints. Two sites were assigned 0.5 occupancy.

Refinement was accomplished by full-matrix least-squares method, based on *F*2, and produced a final *wR*2 value of 0.1531. A conventional *R*1 = 0.0646 was calculated using 6228 observed (*I* > 2.0 **(*I*)) data, 795 parameters, and 8 restraints. The largest peak in the final difference map had a height of 1.663 e Å3 and is in the vicinity of Mo(1).

1. ***Nonlinear optical measurements***

A DMF solution of the cluster **3** was placed in a 5 mm quartz cuvette for optical limiting property measurements which were performed with linearity polarized 7 ns pulses at 532 nm generated from a Q-switched frequency-doubled Nd:YAG laser. The cluster is stable toward air and laser light under experimental conditions. The spatial profiles of the pulsed laser were focused on the sample cell with a 15 cm focal length mirror. The spot radius of the laser beam was measured to be 55 **m (half-width at 1/*e*2 maximum). The energies of the input and output pulses were measured simultaneously by precision laser detectors (Rjp-735 energy probes) while the incident energy was varied by a Newport Com. Attenuator. The interval between the laser pulses was chosen to 1 s to avoid influence of thermal and long-term effects.

The effective third-order NLO absorptive and refractive properties of cluster **3** were recorded by moving the sample along the axis of the incident laser beam (*z* direction), with respect to the focal point instead of being positioned at its focal point, and an identical set-up was adopted in the experiments to measure the *z*-scan data. An aperture of 0.5 mm radius was placed in front of the detector to assist the measurement of the nonlinear optical absorption and self-focusing effect.
